# Supplementary material for: Serum exosomal miR‐638 is a prognostic marker of HCC via downregulation of VE‐cadherin and ZO‐1 of endothelial cells
Source: PubMed Central journal article supplement — Cancer Sci. 2021 Jan 29;112(3):1275–88. doi: 10.1111/cas.14807 (PMC7935782; doi:10.1111/cas.14807), 2021-01-29
Supplement: CAS-112-1275-s001.pdf [file CAS-112-1275-s001.pdf]

## Supplementary Fig.1 PKH67-labeled exosomes transfer to HUVECs.

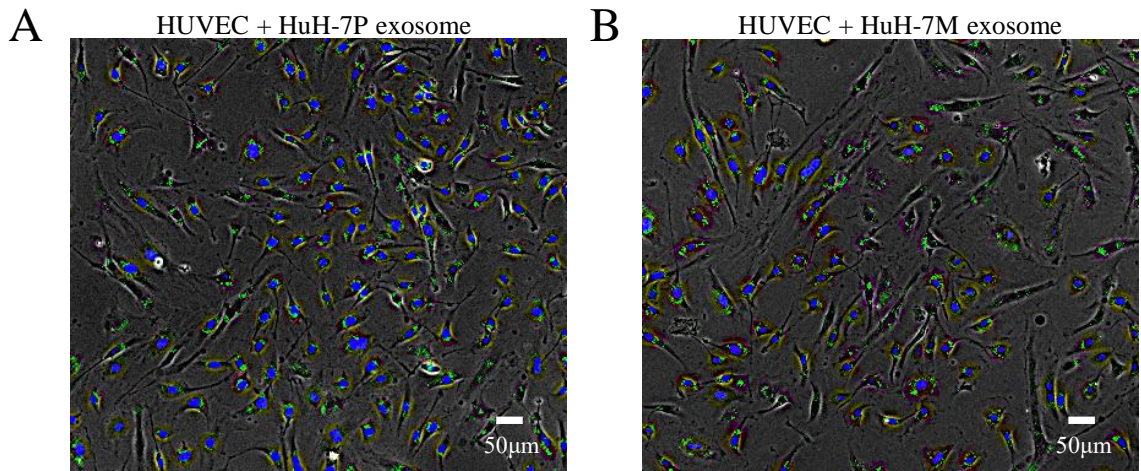

The HuH-7P-derived (A) and HuH-7M-derived (B) exosomes were labeled by PKH67. Uptake of labeled exosomes was observed into more than 90% of HUVECs. Green: exosome. Blue: DAPI. Scale bar, 50  $\mu\text{m}$ .
